# Supplementary material
Source: MDPI journal article supplement (https://www.mdpi.com/2227-9717/9/6/1010)
Supplement: s1 [file s1]

# An Analysis of Operation Conditions and Microbial Characteristics in Swine Wastewater Treatment Plants with Spontaneously Enriched Anammox Bacteria

Miyoko Waki<sup>1\*</sup>, Chikako Ishimoto<sup>2</sup>, Ryu Suto<sup>3</sup>, Takafumi Nagamine<sup>4</sup>, Toshimi Matsumoto<sup>5</sup>, Hirohide Uenishi<sup>5</sup>, Tomoko Yasuda<sup>1</sup>, Yasuyuki Fukumoto<sup>1</sup>

<sup>1</sup> Institute of Livestock and Grassland Science, National Agriculture and Food Research Organization (NARO), 2 Ikenodai, Tsukuba, Ibaraki 305-0901, Japan

<sup>2</sup> Shizuoka Prefectural Research Institute of Animal Industry Swine & Poultry Research Center, 2780 Nishikata, Kikugawa, Shizuoka 439-0037, Japan

<sup>3</sup> Ibaraki Prefectural Livestock Research Center, 1234 Negoya, Ishioka, Ibaraki 315-0132, Japan

<sup>4</sup> Misakura Electric Co, Ltd., 1158-11 Komatsu Miyazaki, 880-2112, Japan

<sup>5</sup> Institute of Agrobiological Sciences, NARO, 1-2 Owashi, Tsukuba, Ibaraki 305-8634, Japan

\* Corresponding Author

Miyoko Waki

Ikenodai 2 Tsukuba 305-0901, Japan

TEL: +81-29-838-8677 FAX: +81-29-838-8606

e-mail: mwaki@affrc.go.jp

## Appendix

**Appendix Table A1:** Anammox activity and deoxyribonucleic acid (DNA) copy number for each biofilm sample

| Facility | Activity represented as<br><i>mean ± sd</i><br>( $\mu\text{mol-N}_2/\text{g-IL/h}$ ) | DNA copy numbers represented as<br><i>mean ± sd</i><br>(copies/g-IL) |
|----------|--------------------------------------------------------------------------------------|----------------------------------------------------------------------|
| Iba-1    | 549 ± 38                                                                             | 5.3×10 <sup>11</sup> ± 4.0×10 <sup>11</sup>                          |
| Iba-2    | 523 ± 113                                                                            | 1.5×10 <sup>11</sup> ± 9.6×10 <sup>9</sup>                           |
| Sai-1    | 278 ± 23                                                                             | 5.5×10 <sup>10</sup> ± 6.3×10 <sup>9</sup>                           |
| Shizu-1  | 339 ± 73                                                                             | 1.8×10 <sup>10</sup> ± 2.2×10 <sup>9</sup>                           |
| Shizu-2  | 192 ± 14                                                                             | 1.2×10 <sup>10</sup> ± 3.3×10 <sup>8</sup>                           |
| Shizu-3  | 57 ± 7                                                                               | 1.1×10 <sup>10</sup> ± 2.1×10 <sup>8</sup>                           |
| Miya-1   | 129 ± 12                                                                             | 4.3×10 <sup>8</sup> ± 3.1×10 <sup>8</sup>                            |
| Miya-2   | 843 ± 21                                                                             | 1.6×10 <sup>12</sup> ± 4.7×10 <sup>11</sup>                          |

**Appendix Table A2:** Water characteristics of influent (inf) and effluent (eff) samples investigated in the facilities

| Facility |        | pH  | EC      | SS     | VSS    | BOD    | NH <sub>4</sub> <sup>+</sup> -N | NO <sub>2</sub> <sup>-</sup> -N | NO <sub>3</sub> <sup>-</sup> -N | BOD/TN | N<br>removal<br>ratio | Sampling<br>date | Reference  |
|----------|--------|-----|---------|--------|--------|--------|---------------------------------|---------------------------------|---------------------------------|--------|-----------------------|------------------|------------|
|          |        | (-) | (mS/cm) | (mg/L) | (mg/L) | (mg/L) | (mg/L)                          | (mg/L)                          | (mg/L)                          | (-)    | (%)                   |                  |            |
| Iba-1    | inf    | 7.2 | -*      | 6250   | 5000   | 4525   | 4931                            | 0                               | 12                              | 0.9    | 98                    | Nov 2014         | [11]       |
|          | eff    | 7.2 | -       | 200    | 200    | 53     | 10                              | 62                              | 4                               |        |                       |                  |            |
|          | inf    | 7.6 | -       | 3250   | 2800   | -      | 4065                            | 0                               | 0.2                             |        | -                     | Feb 2015         | [11]       |
|          | eff    | -   | -       | -      | -      | -      | -                               | -                               | -                               |        |                       |                  |            |
| Iba-2    | inf    | 8.4 | -       | 600    | 600    | 400    | 1730                            | 0                               | 6                               | 0.2    | 93                    | Nov 2014         | [11]       |
|          | eff    | 7.3 | -       | 1850   | 1850   | 204    | 22                              | 99                              | 5                               |        |                       |                  |            |
|          | inf    | 8.5 | -       | 1600   | 1400   | 4645   | 1992                            | 0                               | 0                               | 2.3    | 50                    | Feb 2015         | [11]       |
|          | eff    | 8.7 | -       | 800    | 600    | 480    | 1001                            | 0                               | 0                               |        |                       |                  |            |
|          | inf    | 8.2 | 11.1    | 2315   | 1750   | 5435   | 1337                            | 0                               | 1                               | 3.4    | 93                    | Jun 2016         | This study |
|          | eff    | 7.5 | 1.84    | 760    | 675    | 169    | 5                               | 0                               | 54                              |        |                       |                  |            |
| Sai-1    | inf    | 8.2 | 8.5     | 700    | 500    | 2790   | 897                             | 0                               | 5                               | 2.8    | 73                    | Nov 2016         | This study |
|          | eff**  | 7   | 3.6     | -      | -      | -      | 22                              | 5                               | 212                             |        |                       |                  |            |
| Shizu-1  | inf    | 8.1 |         | 2125   | 1500   | 1285   | 465                             | 0                               | 0.9                             | 2.8    | 80                    | Oct 2014         | [11]       |
|          | eff*** | 7.7 |         | 2525   | 1825   | 169    | 68                              | 17                              | 7.6                             |        |                       |                  |            |
|          | inf    | 8.8 |         | 1950   | 1650   | 845    | 658                             | 0.4                             | 1                               | 1.3    | 48                    | Feb 2015         | [11]       |
|          | eff*** | 8.3 |         | 50     | 50     | 68     | 206                             | 97                              | 38                              |        |                       |                  |            |
| Miya-2   | inf    | 8.1 | 1.86    | 100    | 83     | 1724   | 601                             | 0                               | 0                               | 2.8    | 99                    | Jun 2019         | This study |
|          | eff*** | 7.9 | 2.04    | 54     | 23     | 46     | 0                               | 1                               | 0.3                             |        |                       |                  |            |

\* No data available.

\*\* Samples in the first aeration tank.

\*\*\* Samples in the first sedimentation tank.

**Appendix Table A3:** DO concentrations in aeration tanks on the investigated facilities

| <b>Facility</b> | <b>DO concentration<br/>(mg/L)</b> | <b>Note</b>                                                           |
|-----------------|------------------------------------|-----------------------------------------------------------------------|
| <b>Iba-1</b>    | 0.23                               |                                                                       |
| <b>Iba-2</b>    | 0.19, 0.25, and 0.2                | In the first three tanks, respectively                                |
| <b>Sai-1</b>    | 0.24                               | No aeration period; approximately half day, in the first tank         |
| <b>Shizu-1</b>  | $0.31 \pm 0.39$                    | In the first tank, an average of 2 years monitoring <sup>a</sup> [14] |
| <b>Shizu-2</b>  | 1.06                               | In the second tank                                                    |
| <b>Shizu-3</b>  | 0.4 and 0.3                        | For the first and second tanks, respectively                          |
| <b>Miya-1</b>   | No data                            |                                                                       |
| <b>Miya-2</b>   | 0.44–1.0                           | In the second area of the first aeration tank <sup>b</sup>            |

<sup>a</sup> The data for this facility was obtained from [14]

<sup>b</sup> Measurement day for this facility was June 18, 2019; other samples were measured as same as in Table 1.
